1           **EVOLUTIONARY CONVERGENCE OF A NEURAL MECHANISM IN THE**  
2           **CAVEFISH LATERAL LINE SYSTEM**

3           **Sensory afferents are more active in blind cavefish**

4  
5           *Elias T. Lunsford<sup>1</sup>, Alexandra Paz<sup>2</sup>, Alex C. Keene<sup>2,3</sup>, and James C. Liao<sup>1</sup>*

6           <sup>1</sup>*The Whitney Laboratory for Marine Bioscience*

7           *Department of Biology*

8           *University of Florida*

9           *Saint Augustine, FL USA 32080*

10          <sup>2</sup>*Department of Biological Sciences*

11          *Florida Atlantic University*

12          *Jupiter, FL USA 33458*

13          <sup>3</sup>*Department of Biology*

14          *Texas A&M University*

15          *College Station, TX USA 77843*

16  
17        Phone: 904-201-8404

18        Email: [jliao@whitney.ufl.edu](mailto:jliao@whitney.ufl.edu)

19  
20        Keywords: efference copy, corollary discharge, spontaneous activity, locomotion, hair cells

21  
22        Number of pages: 27

23        Number of figures: 4

24        Numbers of words for abstract: 163/200

25        Numbers of words for introduction: 761

26        Number of words for discussion: 906

27  
28        **Conflict of Interest:** The authors declare no competing financial interests.

29 **Acknowledgements:** We gratefully acknowledge support from the US-Israel BSF SP#2018-190,  
30 National Science Foundation (IOS165674), and National Institute of Health (1R01GM127872) to  
31 ACK, and the National Institute of Health (DC010809), National Science Foundation  
32 (IOS1856237, IOS2102891), and support from the Whitney Laboratory for Marine Biosciences to  
33 JCL.

34

35 **Abstract (163/200)**

36 Animals can evolve dramatic sensory functions in response to environmental constraints,  
37 but little is known about the neural mechanisms underlying these changes. The Mexican tetra,  
38 *Astyanax mexicanus*, is a leading model to study genetic, behavioral, and physiological evolution  
39 by comparing eyed surface populations and blind cave populations. We compared  
40 neurophysiological responses of posterior lateral line afferent neurons and motor neurons across  
41 *A. mexicanus* populations to reveal how shifts in sensory function may shape behavioral diversity.  
42 These studies indicate differences in intrinsic afferent signaling and gain control across  
43 populations. Elevated endogenous afferent activity identified a lower response threshold in the  
44 lateral line of blind cavefish relative to surface fish. We next measured the effect of inhibitory  
45 corollary discharges from hindbrain efferent neurons onto afferents during locomotion. We  
46 discovered that three independently-derived cavefish populations have evolved persistent afferent  
47 activity during locomotion, suggesting for the first time that regression of the efferent system can  
48 be an evolutionary mechanism for neural adaptation of a vertebrate sensory system.

49

## 50 **Introduction**

51           Our understanding of the sensory systems and behavior of animals is challenging to  
52 contextualize within the framework of evolution. Anatomical comparisons between species have  
53 allowed us to infer sensory capabilities, but this approach cannot directly reveal neural function.  
54 Discovery of neural mechanisms that underlie behavior are often constrained to a limited number  
55 of model species (Jourjine & Hoekstra, 2021). Like morphology, neural circuits can adapt to the  
56 environment. Of these, many circuits are sensory and regulate essential behaviors such as foraging,  
57 navigation, and escapes (Blin et al., 2018; Hoke et al., 2012; Hüppop, 1987; Paz et al., 2020).

58           The Mexican blind cavefish, *Astyanax mexicanus*, is a powerful model to understand the  
59 evolution of physiological and molecular traits that contribute to behaviors such as sleep (Duboué  
60 et al., 2011; J. B. Jaggard et al., 2018) and prey capture (Lloyd et al., 2018; Yoshizawa et al.,  
61 2014). *Astyanax mexicanus* exists in two morphs; 1) eyed surface-dwelling populations and 2)  
62 blind cave populations. There are at least 30 independently evolved cavefish populations in the  
63 caves of the Sierra de El Abra region of Northeast Mexico (Herman et al., 2018; McGaugh et al.,  
64 2020; RW Mitchell et al., 1997). *Astyanax mexicanus* populations are interfertile, and this attribute  
65 has allowed investigators to demonstrate independent convergence of numerous behavioral,  
66 developmental, and physiological traits (Chin et al., 2018; Kowalko, 2020; Riddle et al., 2018;  
67 Stockdale et al., 2018; Varatharasan et al., 2009). Our goal is to apply a neurophysiological  
68 approach across multiple *A. mexicanus* populations to examine the functional evolution of the  
69 lateral line sensory system.

70           The mechanoreceptive hair cells of the lateral line system detects fluid motion relative to  
71 the body and play an important role in essential behaviors (McHenry et al., 2009; Mekdara et al.,  
72 2018; Olszewski et al., 2012; Oteiza et al., 2017; Stewart et al., 2013). Cavefish have evolved

73 anatomical enhancements of the lateral line, presumably to compensate for the loss of vision  
74 (Kowalko, 2020; McGaugh et al., 2020; Teyke, 1990; Yoshizawa et al., 2014). These anatomical  
75 alterations have been linked to substantial changes in behavior (Lloyd et al., 2018; Yoshizawa et  
76 al., 2010). However, almost nothing is known about physiological changes that accompany  
77 evolution, despite the fact that the response of peripheral senses to environmental change has been  
78 well documented (Kelley et al., 2018; McBride, 2007).

79 Endogenous depolarizations within sensory cells are transmitted to afferent neurons  
80 (hereafter “afferents”) as spontaneous action potentials (hereafter “spikes”), and are essential for  
81 maintaining a state of responsiveness and sensitivity (Dey et al., 2021; Douglass et al., 1993;  
82 Köppl, 1997) (Kiang, 1965; Manley & Robertson, 1976). This is true in the lateral line, where  
83 spontaneous depolarizing currents within the hair cell maintain a resting potential within the  
84 critical activation range of channels. This range is required to ensure transmitter release; thus these  
85 currents decrease the detection threshold of the system (Trapani & Nicolson, 2011). Spontaneous  
86 afferent activity is an established and reliable target for probing the neurophysiological basis of  
87 sensitivity across taxa (Hedwig, 2006; Krasne & Bryan, 1973; Mohr et al., 2003). Here, we use  
88 spontaneous afferent activity as an entry point into understanding the neural mechanism  
89 underlying lateral line function in cavefish.

90 Another important mechanism that determines lateral line sensitivity is an inhibitory  
91 feedback effect of the efferent system during swimming. Feedback mechanisms in general sculpt  
92 sensory systems in important ways; for example, by changing detection thresholds by altering the  
93 transmission frequency of afferent spikes (Crapse & Sommer, 2008; Straka et al., 2018). The  
94 efferent system of hair cells in particular has repeatedly evolved to modulate sensory processing  
95 (Köppl, 2011). More specifically, hindbrain efferent neurons (hereafter “efferents”) issue

96 predictive signals that transmit in parallel to locomotor commands, termed corollary discharge  
97 (CD). CDs inhibit afferent activity to mitigate sensor fatigue that can result from self-generated  
98 stimuli (Russell & Roberts, 1972). CD is an important mechanism for sensitivity enhancement but  
99 has rarely been implicated for ecologically-relevant behaviors. For example, active-flow sensing  
100 by cavefish depends on detecting reafferent signals while swimming (Tan et al., 2011). Increased  
101 reliance on self-generated fluid motion (Odstrcil et al., 2021; Patton et al., 2010; Teyke, 1985) is  
102 divergent from our current understanding of the CD's role in predictive motor signaling in the  
103 lateral line (Lunsford et al., 2019; Pichler & Lagnado, 2020).

104 For the first time, we identify a neurophysiological mechanism that has convergently  
105 evolved across *A. mexicanus* populations to increase hair cell sensitivity after eye loss. By  
106 investigating how differences in afferent and efferent signaling contribute to sensory enhancement  
107 in a comparative model, we provide insight into a potentially ubiquitous mechanism for sensory  
108 evolution.

109 **Results**

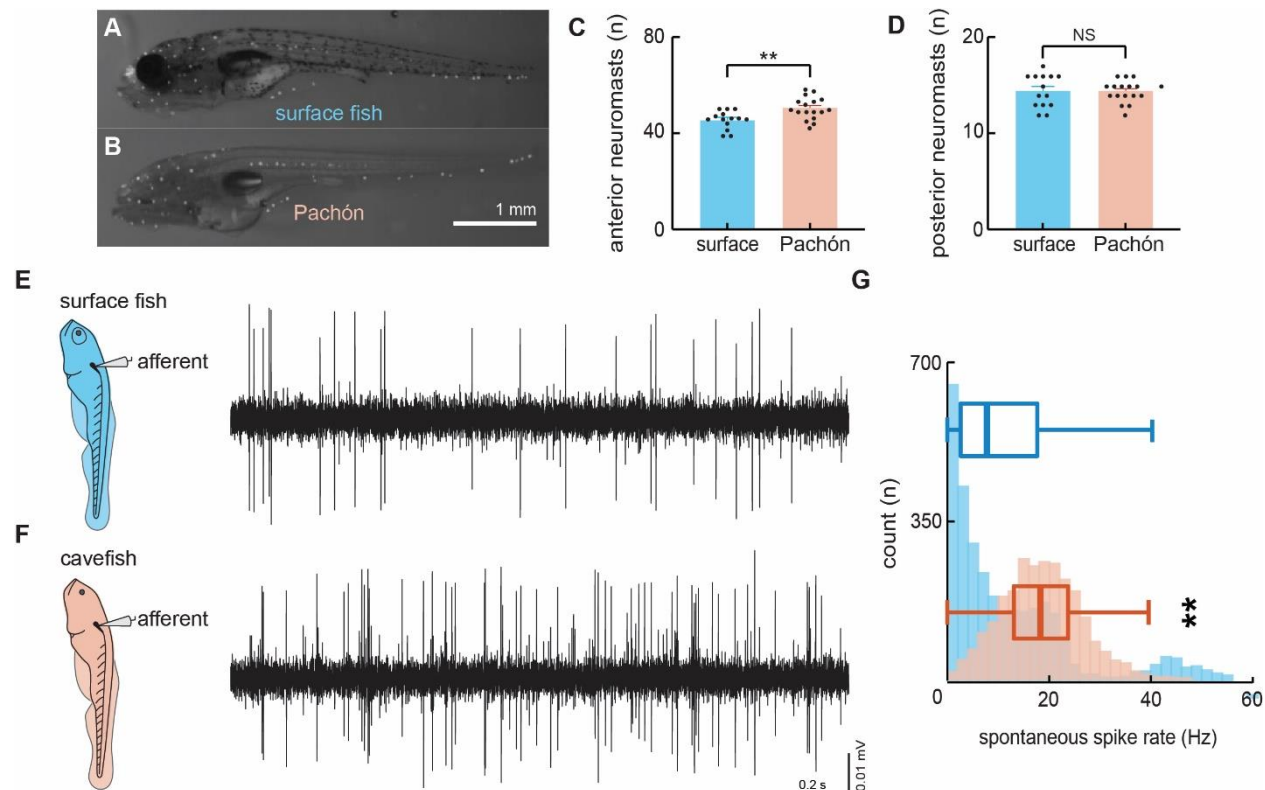

110

**Figure 1. Spontaneous afferent neuron activity is elevated in blind cavefish.** DASPEI staining of 6 dpf surface (A) and cavefish (B) show significantly different quantities of anterior lateral line neuromasts (C) and similar quantities of posterior neuromasts (D). Extracellular recordings were made in posterior lateral line afferents where the neuromast densities were similar in order to resolve the differences observed in afferent activity between larval surface fish (E) and Pachón cavefish (F) between 4-7 dpf. Number of occurrences and median intrinsic spike rates in both surface (blue; 12.4 Hz, n=10 fish) and Pachón (red; 18.6 Hz, n=5 fish) fish suggests that lateral line response thresholds in cavefish are lower than those of surface fish (G). Error bars are  $\pm$  SE.

111

112 Neuromasts of surface fish and Pachón cavefish larvae (6 days post fertilization; dpf) were  
113 labeled via 2-[4- (Dimethylamino)styryl]-1-ethylpyridinium iodide (DASPEI) staining and  
114 subsequently imaged (Figure 1A-B). Anterior lateral line neuromasts had previously been shown  
115 to differ in quantities and morphology as early as 2 months post fertilization between surface and  
116 cave fish (Yoshizawa et al., 2010). Here we show that Pachón cavefish exhibit this significant  
117 increase in anterior neuromast quantity as early as 6 dpf ( $p < 0.01$ ,  $t = 3.168$ ,  $df = 29$ ; Figure 1C).

118 In contrast, both populations exhibit a similar number of posterior lateral line neuromasts ( $p =$   
119  $0.77$ ,  $U = 111.5$ ; Figure 1D). Therefore, to investigate differences in underlying neurophysiology,  
120 we concentrated on the posterior lateral line system where neuromast density is similar across  
121 blind and surface morphs. We exclusively probed the posterior lateral line afferent neurons to  
122 establish whether sensory systems that are anatomically similar exhibit neurophysiological  
123 differences that contribute to enhanced sensitivity.

124 To examine the physiological basis of differences in lateral line function across surface and  
125 cavefish we used extracellular lateral line recordings adapted from protocols used in zebrafish  
126 (Figure 1E-F). Extracellular recordings of posterior lateral line afferents revealed intrinsic  
127 spontaneous activity was higher in Pachón cavefish ( $18.6 \pm 0.2$  Hz) while the animal was at rest,  
128 relative to surface fish ( $12.4 \pm 0.3$  Hz;  $p < 0.01$ ,  $t = 15.97$ ,  $df = 5,795$ ; Figure 1G). Instantaneous  
129 afferent spike rate demonstrates substantial decreases during swimming in surface fish (surface =  
130 3,167 swim bouts) and little effect in Pachón cavefish (Pachón = 2,612 swim bouts; Figure 2 A-  
131 B). We quantified and compared spike rates during swimming relative to the pre-swim period to  
132 examine patterns of the inhibitory effect between populations. During most surface fish swim  
133 bouts there was a reduction in afferent activity ( $n = 1,966/2,291$ , 85.8%), many of which resulted  
134 in complete quiescence of transmissions ( $n = 1,112/2,291$ , 48.5%). Conversely, afferent activity  
135 partially reduced during many swim bouts in Pachón cavefish ( $n = 1,303/2,439$ , 53.4%), but very  
136 few instances led to complete inhibition ( $n = 275/2,439$ , 11.3%). The distributions of relative spike  
137 rates during swimming reveal surface fish have a higher likelihood of experiencing no afferent  
138 activity during swimming while cavefish experience afferent activity during swimming similar to  
139 that of pre-swim activity levels (Figure 2 C). Therefore, surface fish experience significantly  
140 higher levels of inhibition ( $68.5 \pm 0.01\%$ ) compared to cavefish ( $28.9 \pm 0.01\%$ ;  $p < 0.01$ ,  $t = 36.5$ ,

141 df = 4449; Figure 2 D). Surface fish demonstrate lateral line inhibition during swimming  
142 comparable to other fishes with intact visual systems (Flock & Russell, 1973; Lunsford et al.,  
143 2019; Pichler & Lagnado, 2020; Russell & Roberts, 1972) suggesting cavefish have evolved a  
144 unique functional phenotype for sensory gain control.

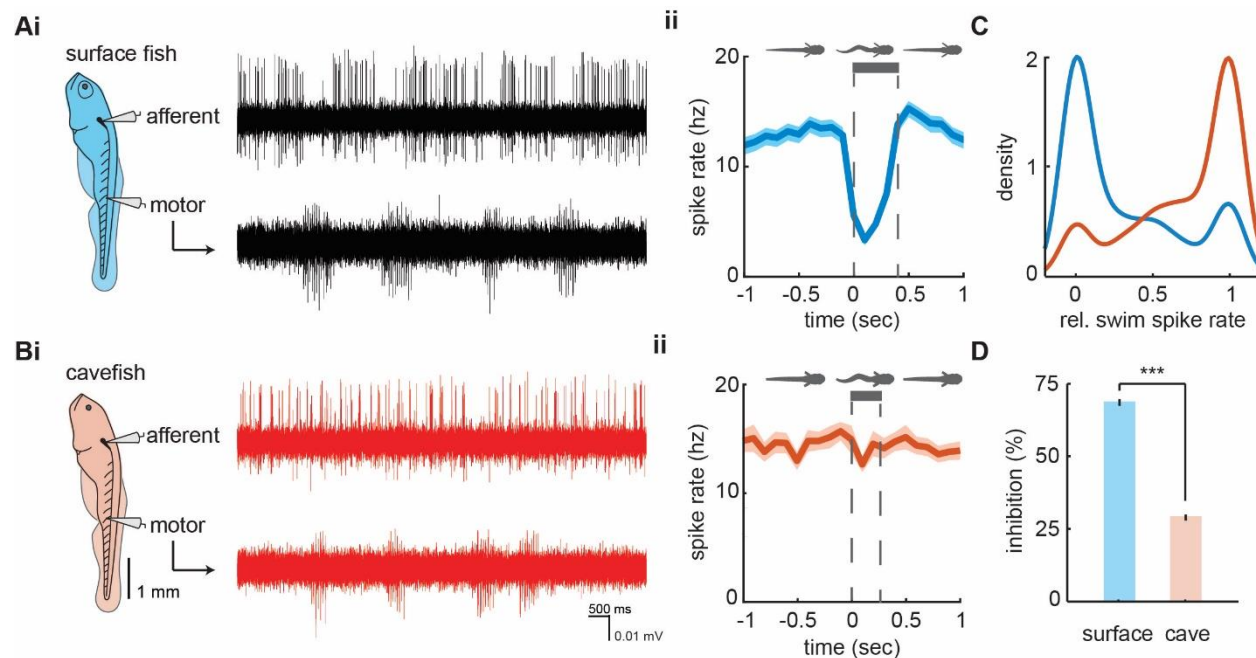

**Figure 2. Afferent spike rate decreases during swimming in surface fish but not cavefish.** Simultaneous recordings from afferent neurons from the posterior lateral line afferent ganglion and ventral motor roots along the body in (Ai) surface fish and (Bi) Pachón cavefish. Afferent spike rate decreases at the onset of swimming (time = 0) in (Aii) surface fish while (Bii) Pachón cavefish spike rate remained relatively constant during swimming. Bars represent average swim duration for surface fish (0.39 sec, n = 2,272 swims) and Pachón cavefish (0.27 sec, n = 2,429 swims). C. Kernel density estimate of spike rate during swimming relative to the pre-swim interval in both surface fish (blue) and cavefish (red). D. Surface fish experience greater levels of inhibition during swimming than cavefish. Significance level indicated by ‘\*\*\*’. Error bars are  $\pm$  SE.

145  
146 We imaged hindbrain cholinergic efferent neurons to determine anatomical and functional  
147 connectivity. Between populations, backfilled efferents revealed similar soma quantities (surface:  
148  $2.4 \pm 0.3$ ; cave:  $3.2 \pm 0.5$ ;  $p = 0.2$ ,  $t = 1.36$ ,  $df = 18$ ) and size (surface:  $62.1 \pm 3.6 \mu\text{m}^2$ ; cave:  $70.9$   
149  $\pm 4.5 \mu\text{m}^2$ ;  $p = 0.1$ ,  $t = 1.50$ ,  $df = 51$ ; Figure 3 A-C). From electrophysiological recordings, we



150 observed average spike rates during and prior to a swim were not positively correlated in control  
151 surface fish ( $r^2 = 0.15$ ,  $F_{1,13} = 2.3$ ,  $p = 0.2$ ), but the slope of the line indicates a fractional  
152 suppression of 78% that is significantly less than unity (slope 0.1, confidence interval (CI): -0.2-  
153 0.4; Figure 3 Di). After efferent ablation, surface fish average spike rates during and prior to a  
154 swim were not distinguishable from unity (slope 1.2, CI = -0.1-2.4) indicating that spike rates  
155 during swimming intervals differ from non-swimming intervals no differently than chance and  
156 therefore there is no detectable inhibitory effect. While swimming, surface fish without  
157 functioning efferent neurons demonstrated a signaling phenotype similar to both intact cavefish  
158 (slope 0.88, CI = -0.5-2.2) and cavefish with ablated efferents (slope 0.9, CI = 0.1-1.8; Figure 3  
159 Dii). Therefore, putative cholinergic hindbrain efferents are necessary for afferent inhibition in  
160 surface fish, but do not demonstrate modulatory control of afferents in cavefish.

161 We compared pre-swim and swim spike rates across populations and treatments to  
162 determine efferent contribution to inhibition (Figure 3 E). We found significant differences in  
163 afferent activity among pre-swim and swim intervals ( $F_{7,40} = 7.6$ ,  $p < 0.01$ ; Figure 3 F). Surface  
164 fish afferent spike rates during swimming ( $3.9 \pm 0.1$  Hz) were 71% lower than the immediate pre-  
165 swim period in control fish ( $13.7 \pm 0.2$  Hz; Tukey's post hoc test,  $p < 0.01$ ). Post-swim spike rate  
166 ( $13.7 \pm 0.3$  Hz) recovered to pre-swim spike rate. In control Pachón cavefish, we observed some  
167 decrease in afferent spike rate during swimming ( $16.8 \pm 0.2$  Hz) but it was not statistically  
168 discriminated from pre-swim ( $20.5 \pm 0.2$  Hz; Tukey's post hoc test,  $p = 0.94$ ). Efferent ablation in  
169 surface fish resulted in afferent activity during swimming ( $17.4 \pm 0.3$  Hz) to increase to pre-  
170 swim levels ( $20.7 \pm 0.3$  Hz; Tukey's post hoc test,  $p = 0.99$ ). Ablated surface fish also demonstrated  
171 spike dynamics during swimming comparable to ablated and control cavefish (Pachón ablated,  
172 pre-swim:  $18.6 \pm 0.3$  Hz; Pachón ablated, swimming:  $14.7 \pm 0.3$  Hz). These findings indicate that

173 efferents are necessary for inhibition of afferents during swimming in surface fish, but not  
 174 cavefish.

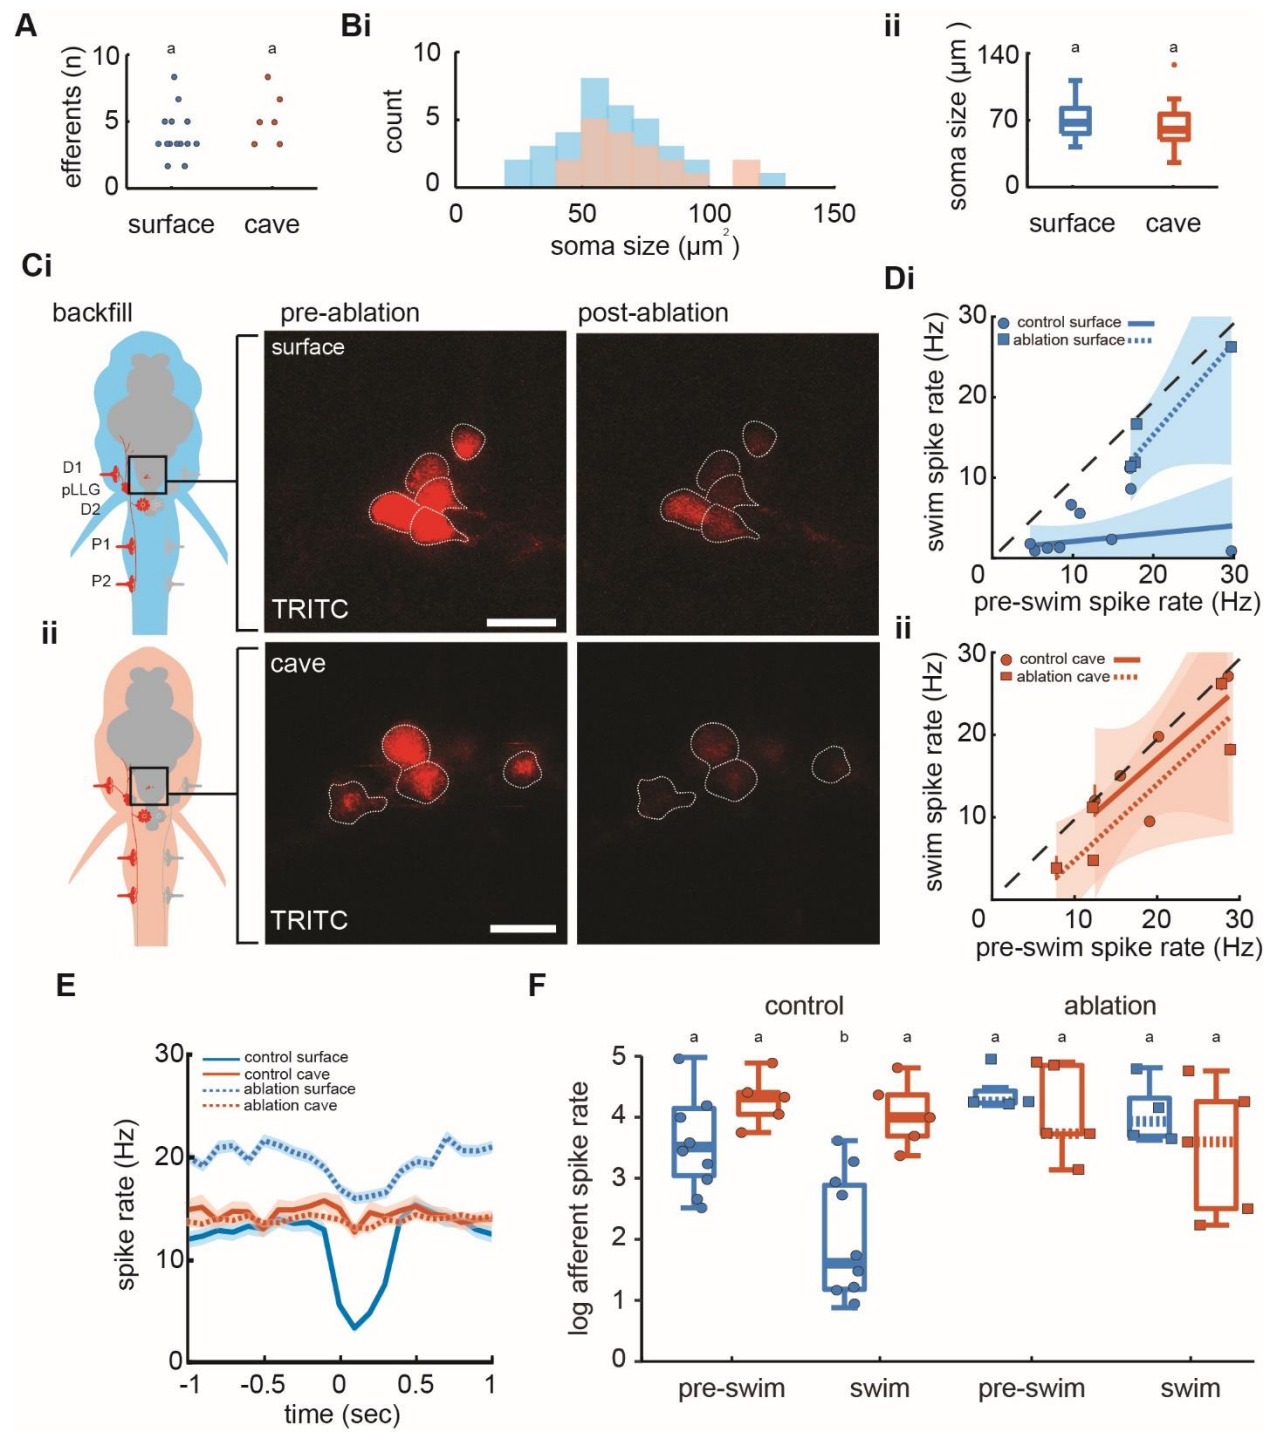

**Figure 3. Efferent neurons are necessary for inhibition observed in afferents during swimming in surface fish but not cavefish.** **A.** Backfilled hindbrain cholinergic efferent neurons were present in comparable numbers (2-3 cells) in both surface fish (n = 14) and cavefish (n = 6). **Bi.** Efferent soma size in surface (blue) and cavefish (red) is similar in both populations (**ii**). **C.** Efferent cell bodies were identified by backfilling rhodamine through posterior lateral line neuromasts in both surface fish (**i**) and cavefish (**ii**) and were ablated with a 30-s UV pulse. Scale bar: 20  $\mu$ m. **D.** The line of best fit of spike rates before compared to during the swim significantly excludes unity in non-ablated, control surface fish (circle), but not in ablated surface fish (square), implying spike rate suppression in the former but not the latter (**i**). The slope of the line for control fish suggests the inhibition is not correlated to the spontaneous afferent activity preceding the swim. The line of best fit of Pachón cavefish pre-swim and swim spike rates did not exclude unity in both control (circle) and ablated (square) treatments (**ii**). Dashed line indicates the line of unity, corresponding to no average difference of spike rate during swimming. **E.** Instantaneous spike rates of Pachón cavefish were unaffected by ablating the lateral line whereas the inhibitory effect was eliminated in ablated surface fish. Time is relative to the onset of motor activity. **F.** Surface fish (blue) display reduced spike rates during swimming compared to before swimming in control fish. Pachón cavefish (red) did not display reduced spike rate during swimming in neither control nor ablated treatments. Ablated surface individuals also did not display reduced spike rate during swimming resulting in a signaling phenotype comparable to cavefish. Groupings of statistical similarity are denoted by ‘a’ and ‘b’, whereas a is significantly different from b. All error bars represent  $\pm$  SE.

176  
177 We compared lateral line activity between three different cave populations (Figure 4 A); the Tinaja  
178 and Pachón populations, which are derived from similarly timed colonization events, and the  
179 Molino population that is derived from a more recent colonization event (Bradic et al., 2012;  
180 Dowling et al., 2002; Herman et al., 2018). Blind cavefish populations exhibited similar  
181 spontaneous spike rates across populations ( $F_{2,17} = 0.68$ ,  $p = 0.52$ ), and swimming showed little  
182 effect on lateral line activity across blind cavefish populations (Figure 4 B). We observed a minor  
183 decrease in afferent spike rates across cavefish populations and the relative change (i.e. inhibition)  
184 was similar in Pachón and Tinaja (Tukey’s post hoc test; Pachón:  $0.28 \pm 0.01$ ; Tinaja:  $0.32 \pm 0.02$ ;  
185 Figure 4 C). Molino demonstrated an intermediate phenotype compared to Pachón and Tinaja  
186 (Tukey’s post hoc test; Molino:  $0.23 \pm 0.01$ ;  $p < 0.01$ ). The Molino population (new lineage) is  
187 most distantly related to the Pachón and Tinaja populations (old lineage), originating from a more  
188 recent surface fish colonization of caves thus providing phylogenetic evidence that

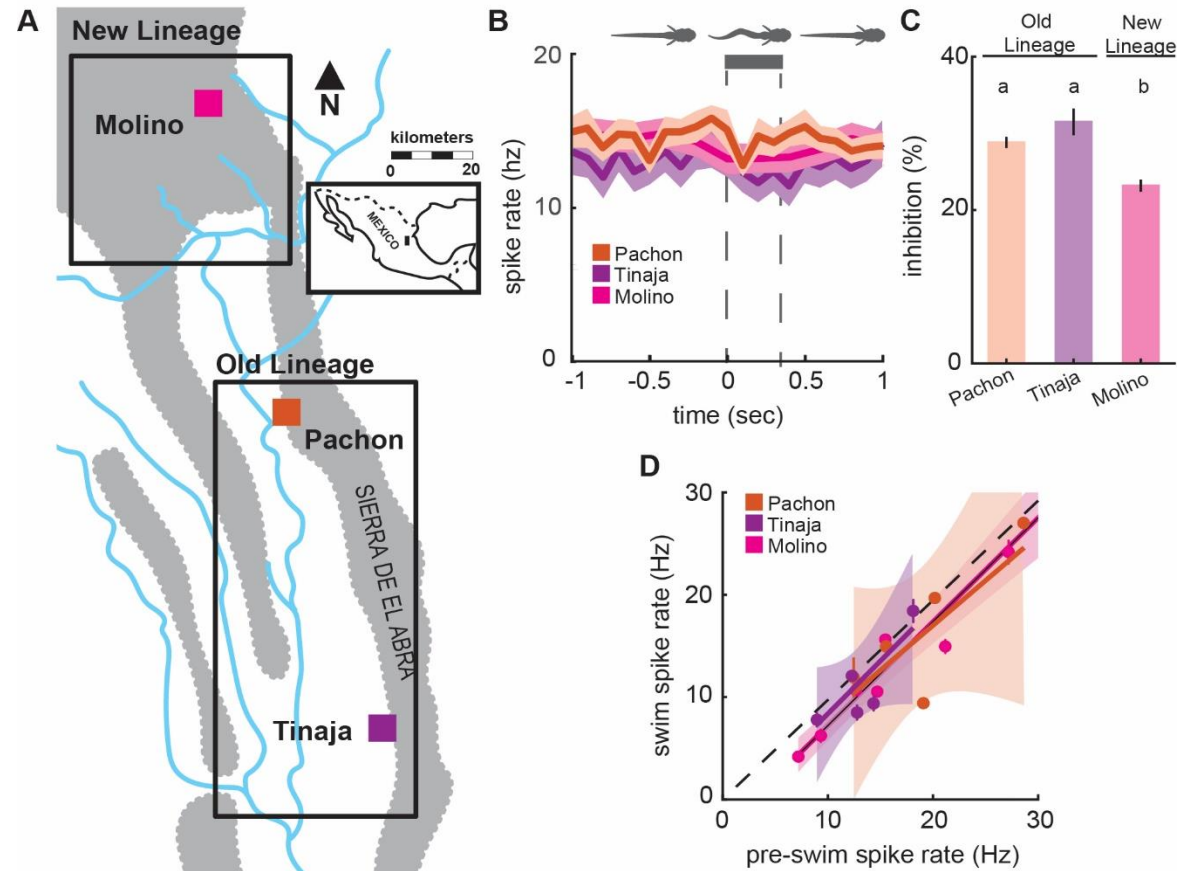

189

**Figure 4. Enhanced lateral line sensitivity during swimming convergently evolved across three blind populations.** **A.** Molino cave populations (pink; New Lineage) have evolved more recently relative to Pachón (red) and Tinaja (purple; Old Lineage) cave populations. Lineage delineations inferred from phylogenetic data (Herman et al. 2018). **B.** Mean spontaneous afferent spike rate remains constant at the onset of fictive swimming (time = 0) in Pachón (n = 5), Molino (n = 8), and Tinaja (n = 5) populations. Bar represents average swim duration for Pachón (0.27 sec, n = 2,429 swim bouts), Molino (0.42 sec, n = 1,474 swim bouts), and Tinaja (0.35 sec, n = 464). **C.** Percent change in spike rate from pre-swim to swim intervals (i.e. inhibition) was small, but significantly different between blind cave populations. Post-hoc Tukey test revealed that Molino cavefish experienced significantly less reduction in spike rate when compared to Pachón and Tinaja populations. Statistically similar groups are indicated by 'a' and 'b'. **D.** The line of best fit of pre-swim and swim spike rates does not significantly exclude unity in any of the blind cavefish populations implying there is no detectable inhibitory effect. Dashed line indicates the line of unity, corresponding to no average difference of spike rate during swimming. All values represent mean  $\pm$  SE.

190

191 coincides with statistically similar groupings (Herman et al., 2018). We examined the correlation

192 between non-swimming and swimming spike rates across cave populations to determine whether  
193 the inhibitory effect was significant. Spike rates during swimming and pre-swim intervals were  
194 not positively correlated in all cave populations, and afferent spike rates during swimming were  
195 not statistically distinguishable from unity across populations (Pachón: slope = 0.88, CI = -0.5 –  
196 2.2; Tinaja: slope = 1.03, CI = -0.2 - 2.2; Molino: slope = 1.02, CI = 0.8 - 1.2; Figure 4 D),  
197 indicating there was no significant decrease in afferent activity during swimming within blind  
198 cavefish populations.

## 199 **Discussion**

200 Our principle finding indicates that elevated afferent activity underlies the increased  
201 responsiveness of cavefish to flow stimuli. The increased afferent activity in cavefish is a likely  
202 consequence of eye-loss, which has robust effects on other physiological systems (Duboué et al.,  
203 2011; Varatharasan et al., 2009). Heightened lateral line sensitivity in adults has been previously  
204 attributed to increased neuromast density in the anterior lateral line (ALL) (J. Jaggard et al., 2017;  
205 Lloyd et al., 2018; McHenry et al., 2008; Patton et al., 2010; Teyke, 1990; Yoffe et al., 2020, 2020;  
206 Yoshizawa et al., 2010). This difference in neuromast quantity does not exist in the posterior lateral  
207 line at the larval stage, allowing us a unique opportunity to investigate the neural mechanisms that  
208 can enhance flow sensing in a strong model for evolution. Our discovery of increased spontaneous  
209 activity in cavefish is a powerful addition for flow sensing, and we predict that this in combination  
210 with the increased density of neuromasts in the ALL is what ultimately enables cavefish to perform  
211 active flow sensing (Yoshizawa et al., 2010).

212 Higher spontaneous activity is one of two mechanisms that are responsible for higher  
213 lateral line sensitivity. The other involves the inhibitory effects of the efferent system during  
214 swimming, a feedback mechanism that is conserved across the diversity of fishes (Flock & Russell,  
215 1973; Lunsford et al., 2019; J. Montgomery et al., 1996; J. C. Montgomery & Bodznick, 1994;

216 Roberts & Russell, 1972; Tricas & Highstein, 1991). This is true in swimming surface fish but not  
217 in cavefish. We found that three blind populations of cavefish (i.e. Pachón, Molino, Tinaja) have  
218 repeatedly lost the capability for efferent modulation during swimming. When one considers that  
219 lateral line efferent activity can be driven by direct inputs from the visual system in zebrafish  
220 (Reinig et al., 2017), it seems possible that eye degeneration induces the loss of efferent function.  
221 This interpretation is consistent with the idea that lateral line efferents are thought to have  
222 undergone regressive loss before in the ancestral lamprey and hagfish (Kishida et al., 1987; Köppl,  
223 2011; Koyama et al., 1990), both of which are nearly or completely blind during development  
224 (Dickson & Collard, 1979; Fernholm & Holmberg, 1975). However, our results illustrate that  
225 cholinergic efferent system is still present in cavefish, having lost functionality rather than  
226 disappearing (the efferent system is functional in surface fish). Exploring pre- and postsynaptic  
227 differences such as acetylcholine release or the density of nicotinic acetylcholine receptors  
228 (nAChR) may explain the reduced inhibitory efficacy and reveal molecular targets that could  
229 disrupt efferent function over the course of evolution (Dawkins et al., 2005).

230 Our demonstration of CD inactivity in cavefish provides an alternative mechanism by  
231 which evolution can enhance sensitivity, one that proceeds by decreasing inhibition rather than  
232 augmenting sensor morphology or density (Yamamoto et al., 2009; Yoshizawa et al., 2010, 2014).  
233 The impact of increasing sensitivity through a lack of inhibition is apparent during active-flow  
234 sensing in adult *A. mexicanus*. Active-flow sensing occurs during swimming and involves using  
235 the reflection of self-generated flow fields (Bleckmann et al., 1991) to follow walls (Patton et al.,  
236 2010), avoid obstacles (Teyke, 1985; Windsor et al., 2008), and discrimination between shapes  
237 (De Perera, 2004; Hassan, 1989; Von Campenhausen et al., 1981). The repeated loss of inhibitory

238 feedback across blind cavefish populations suggests that it is easier to cease function than to  
239 develop more neuromasts or other additive alternatives.

240 Cavefish swim by using different body motions than surface fish. This finding has been  
241 interpreted as a mechanism to enhance wall following, which occurs when the bow wake of a  
242 swimming cavefish is reflected off of a solid surface and then detected (Patton et al., 2010; Sharma  
243 et al., 2009). Altered swimming kinematics is also thought to have arisen from a general increase  
244 in sensitivity to flow (Tan et al., 2011; Windsor et al., 2008). Our results provide an alternate  
245 suggestion; the lack of efferent function in cavefish precludes the sensory feedback necessary for  
246 sensing self-movement and body position in water (proprioception). Corollary discharge, a parallel  
247 motor command that decreases the afferent activity of fishes when swimming, has recently been  
248 found to play a critical role in swimming efficiency by enabling the tracking of the traveling body  
249 wave during undulation (Skandalis et al., 2021). We hypothesize that the evolved loss of efferent  
250 function that enables cavefish to successfully avoid collisions in subterranean habitats is likely  
251 favored over optimizing swimming efficiency (Nakamura, 1997; Uysal et al., 2010). We predict  
252 that loss of efferent function will be found in other blind hypogean species (Costa Sampaio et al.,  
253 2012) and that their respective surface populations will possess intact efferent functionality, as we  
254 have found in *A. mexicanus*. Neurophysiological recordings across a wider diversity of species  
255 would provide valuable insight into how efferent function may be sculpted by environmental  
256 selection and phylogenetic membership.

257 By employing neurophysiological approaches in the lateral line system of *A. mexicanus* for  
258 the first time, we show that elevated lateral line afferent activity and loss of efferent function have  
259 repeatedly evolved together across cavefish populations. Our findings come at a time when genetic  
260 tools in *A. mexicanus* enable brain-wide imaging and gene-editing based screening to identify

261 candidate neural circuits and genes critical in the evolution of sensory systems (Jaggard et al.,  
262 2020; Warren et al., 2021). Going forward, applying genetic and electrophysiological tools in well-  
263 characterized neural circuits promises to inform our understanding of the evolution of neural  
264 systems and behavior more broadly.

## 265 **Materials and Methods**

266 *Animals:* Fish were progeny of pure-bred stocks originally collected in Mexico (Duboué et  
267 al., 2011) that have been maintained at the Florida Atlantic University core facilities. Larvae were  
268 raised in 10% Hank's solution (137 mM NaCl, 5.4 mM KCl, 0.25 mM Na<sub>2</sub>HPO<sub>4</sub>, 0.44 mM  
269 KH<sub>2</sub>PO<sub>4</sub>, 1.3 mM CaCl<sub>2</sub>, 1.0 mM MgSO<sub>4</sub>, 4.2 mM NaHCO<sub>3</sub>; pH 7.3) at 26°C. All experiments  
270 were performed according to protocols approved by the University of Florida or Florida Atlantic  
271 University Institutional Animal Care and Use Committee. Animal health was assessed by  
272 monitoring blood flow throughout each experiment.

273 *Neuromast imaging:* To assess neuromast quantities, larvae aged six dpf were submerged in 5  
274 µg/ml DASPEI dissolved in embryo medium for 15 minutes as previously described (Van Trump  
275 et al., 2010). Larvae were then transferred to ice-cold water for 30-45 seconds then immersed in  
276 8% methylcellulose for imaging. Images were taken using a Nikon DS-Qi2 monochrome  
277 microscope camera mounted on a Nikon SMZ25 Stereo microscope (Nikon; Tokyo, Japan).  
278 Neuromasts innervated by posterior lateral line afferents and anterior lateral line afferents were  
279 tabulated separately.

280 *Electrophysiology:* Prior to recordings, *A. mexicanus* larvae (4-7 dpf) were paralyzed using  
281 0.1% α-bungarotoxin (Lunsford & Liao, 2021). Once paralyzed, larvae were then transferred into  
282 extracellular solution (134 mM NaCl, 2.9 mM KCl, 1.2 mM MgCl<sub>2</sub>, 2.1 mM CaCl<sub>2</sub>, 10 mM



283 glucose, 10 mM HEPES buffer; pH 7.8, adjusted with NaOH) and pinned with etched tungsten  
284 pins through their dorsal notochord and otic vesicle into a Sylgard-bottom dish.

285 Multiunit extracellular recordings of the posterior lateral line afferent ganglion were made  
286 in surface fish (n = 10) and Pachón cave fish (n = 5). Prior to recording from the afferent neurons,  
287 a bore pipette was used to break through the skin to expose the afferent soma. Recording electrodes  
288 (~30  $\mu$ m tip diameter) were pulled from borosilicate glass (model G150F-3, inner diameter: 0.86,  
289 outer diameter: 1.50; Warner Instruments, Hamden, CT) on a model P-97 Flaming/Brown  
290 micropipette puller (Sutter Instruments, Novato, CA) and filled with extracellular solution. Once  
291 contact with afferent somata was achieved, gentle negative pressure was applied (20-50 mmHg;  
292 pneumatic transducer tester, model DPM1B, Fluke Biomedical Instruments, Everett, WA).  
293 Pressure was adjusted to atmospheric (0 mmHg) once a stable recording was achieved.  
294 Simultaneously, ventral root (VR) recordings were made through the skin (Masino & Fetcho,  
295 2005) to detect voluntary fictive swimming. All recordings were sampled at 20 kHz and amplified  
296 with a gain of 1000 in Axoclamp 700B, digitized with Digidata 1440A and saved in pClamp10  
297 (Molecular Devices).

298 All recordings were analyzed in Matlab (vR2016b) using custom written scripts. Both  
299 spontaneous afferent spikes and swimming motor activity identified using a combination of spike  
300 parameters previously described (Lunsford et al., 2019). Afferent neuron activity within a time  
301 interval equal to the subsequent fictive swim bout, hereafter termed “pre-swim”, was quantified  
302 and compared to afferent activity during swimming to measure relative changes in spontaneous  
303 firing.

304 *Efferent Ablations:* Hindbrain efferent neurons were backfilled with tetramethylrhodamine  
305 (TRITC, 3 kDa; Molecular Probes, Eugene, OR). *A. mexicanus* larvae (4 dpf) were anesthetized

306 in MS-222 (Tricaine, Western Chemical Inc. Ferndale, WA) and embedded in agar. To selectively  
307 label the hindbrain cholinergic efferent neurons, we systematically electroporated (Axoporation  
308 800A Single Cell Electroporator, Axon CNS Systems, Molecular Devices LLC, San Jose, CA)  
309 TRITC into the efferent terminals that innervate the D1, D2, L1, and L2 neuromasts of the lateral  
310 line in surface fish (n = 14) and Pachón cavefish (n = 7). Electroporation does not ensure labelling  
311 of all efferent neurons so we standardized parameters (30 V, 50 Hz, 500 ms, square pulse) and  
312 targeted the same neuromasts across populations to minimize variation in labelling efficacy.  
313 Larvae were then gently freed from the agar and allowed to swim freely and recover overnight.  
314 Larvae (5 dpf) were then paralyzed via  $\alpha$ -bungarotoxin immersion, remounted in agar dorsal  
315 surface down, and imaged on a Leica SP5 confocal microscope (Leica Microsystems, Wetzlar,  
316 Germany). Efferent soma size and quantity was measured within identified TRITC-labelled cells  
317 in ImageJ (v1.48; U. S. National Institutes of Health, Bethesda, MD). To perform targeted  
318 ablations of surface fish (n = 5) and cavefish (n = 6) efferent neurons, a near-ultraviolet laser was  
319 focused at a depth corresponding to the maximum fluorescence intensity of each soma, to ensure  
320 we were targeting its centre. We applied the FRAP Wizard tool in Leica application software to  
321 target individual cells. We ablated target cells with a 30 s exposure to the near-ultraviolet laser line  
322 (458 nm), and successful targeting was confirmed by quenching of the backfilled dye. This method  
323 has been successfully applied and validated in similar systems (Liu & Fetcho, 1999; Soustelle et  
324 al., 2008). Fish were again freed from agar and allowed to swim freely and recover overnight.  
325 Electrophysiological recordings were performed on ablated surface fish (n = 4) and cavefish (n =  
326 5) at 6 dpf to simultaneously monitor afferent activity and motor activity.

327 *Statistical analysis:* Neuromast data were analyzed using GraphPad Prism 8.4.3. Normality  
328 was assessed via Shapiro-Wilk test. Anterior lateral line neuromast count data were found to be

329 normally distributed. Anterior lateral line neuromast quantities in surface and cave larvae were  
330 compared using an unpaired t-test. Posterior lateral line neuromast count was found to not be  
331 normally distributed and was subsequently analyzed via Mann-Whitney U-test

332         Analyses of electrophysiological data were performed using custom written models in the  
333 R language (R development core team, vR2016b) using packages car, visreg, reshape2, plyr, dplyr,  
334 ggplot2, gridExtra, minpack.lm, nlstools, investr, and cowplot (Auguie et al., 2017; Baty et al.,  
335 2015; Breheny & Burchett, 2017; Fox & Weisberg, 2018; Wickham, 2007, 2009; Wickham et al.,  
336 2019; Wilke, 2019). Spontaneous afferent spike rate was calculated by taking the number of spikes  
337 over the duration of time where the larva was inactive. Instantaneous afferent spike rate was  
338 calculated using a moving average filter and a 100 ms sampling window. Pre-swim and swim spike  
339 rate were calculated by taking the number of spikes within the respective period over its duration.  
340 Pre-swim periods of inactivity made it challenging to interpret changes in afferent activity, so we  
341 restricted the dataset to only include swim bouts that were preceded by a minimum of one afferent  
342 spike within the pre-swim interval (surface = 2,291 swim bouts; Pachón = 2,429 swim bouts;  
343 Molino = 1.474 swim bouts; Tinaja = 464 swim bouts). Swim frequency was calculated by taking  
344 the number of bursts within a swim bout over the duration of the swim bout. Relative spike rate  
345 was calculated by taking the swim spike rate over the pre-swim spike rate. All variables were  
346 averaged for each individual fish. The precision of estimates for each individual is a function of  
347 the number of swims, so we analyzed variable relationships using weighted regressions, with  
348 individual weights equal to the square root of the number of swims. We log transformed variables  
349 in which the mean and the variance were correlated. To quantify the inhibition of the afferent spike  
350 frequency during swimming we tested for a significant difference in afferent spike frequency  
351 during swimming as compared to non-swimming periods using a paired sample student's t-test.

352 Differences in afferent spike rates between the periods of interest (pre-swim and swim) across  
353 populations and treatments were tested by N-way analysis of variance (ANOVA) followed by  
354 Tukey's post-hoc test to detect significant differences in spike rates between swim periods or  
355 treatments. Linear models were used to detect relationships between spike rate during swimming  
356 and other independent variables (e.g. spike rate pre-swim). Data is shown throughout the  
357 manuscript as mean  $\pm$  standard error. Statistical significance is reported at  $\alpha = 0.05$ .

358 **Author Contributions:**

359 E.T.L. and J.C.L. conception and design of research; E.T.L. performed electrophysiology and  
360 hindbrain imaging experiments; A.P. performed lateral line imaging; E.T.L. and A.P. analyzed  
361 data; E.T.L., A.P., A.C.K. and J.C.L. interpreted results of experiments; E.T.L. prepared figures;  
362 E.T.L. drafted manuscript; E.T.L., A.P., A.C.K. and J.C.L. edited and revised manuscript; E.T.L.,  
363 A.P., A.C.K. and J.C.L. approved final version of manuscript.

364

365

366 **References**

- 367 Auguie, B., Antonov, A., & Auguie, M. B. (2017). Package 'gridExtra.' *Miscellaneous Functions for "Grid"*  
368 *Graphics*.
- 369 Baty, F., Ritz, C., Charles, S., Brutsche, M., Flandrois, J.-P., & Delignette-Muller, M.-L. (2015). A toolbox  
370 for nonlinear regression in R: The package nlstools. *Journal of Statistical Software*, 66(5), 1–21.
- 371 Bleckmann, H., Breithaupt, T., Blickhan, R., & Tautz, J. (1991). The time course and frequency content of  
372 hydrodynamic events caused by moving fish, frogs, and crustaceans. *Journal of Comparative Physiology*  
373 *A*, 168(6), 749–757.
- 374 Blin, M., Tine, E., Meister, L., Elipot, Y., Bibliowicz, J., Espinasa, L., & Rétaux, S. (2018). Developmental  
375 evolution and developmental plasticity of the olfactory epithelium and olfactory skills in Mexican  
376 cavefish. *Developmental Biology*, 441(2), 242–251.
- 377 Bradic, M., Beerli, P., García-de León, F. J., Esquivel-Bobadilla, S., & Borowsky, R. L. (2012). Gene flow  
378 and population structure in the Mexican blind cavefish complex (*Astyanax mexicanus*). *BMC*  
379 *Evolutionary Biology*, 12(1), 9. <https://doi.org/10.1186/1471-2148-12-9>
- 380 Breheny, P., & Burchett, W. (2017). Visualization of regression models using visreg. *R J.*, 9(2), 56.
- 381 Chin, J. S. R., Gassant, C. E., Amaral, P. M., Lloyd, E., Stahl, B. A., Jaggard, J. B., Keene, A. C., & Duboue, E.  
382 R. (2018). Convergence on reduced stress behavior in the Mexican blind cavefish. *Developmental*  
383 *Biology*, 441(2), 319–327. <https://doi.org/10.1016/j.ydbio.2018.05.009>
- 384 Costa Sampaio, F. A., Pompeu, P. S., de Andrade e Santos, H., & Lopes Ferreira, R. (2012). Swimming  
385 performance of epigeal and hypogeal species of Characidae, with an emphasis on the troglolobiotic  
386 *Stygichthys typhlops* Brittan & Böhlke, 1965. *International Journal of Speleology*, 41(1), 2.
- 387 Crapse, T. B., & Sommer, M. A. (2008). Corollary discharge across the animal kingdom. *Nature Reviews.*  
388 *Neuroscience*, 9(8), 587–600. <https://doi.org/10.1038/nrn2457>
- 389 Dawkins, R., Keller, S. L., & Sewell, W. F. (2005). Pharmacology of acetylcholine-mediated cell signaling in  
390 the lateral line organ following efferent stimulation. *Journal of Neurophysiology*, 93(5), 2541–2551.  
391 <https://doi.org/10.1152/jn.01283.2004>
- 392 De Perera, T. B. (2004). Fish can encode order in their spatial map. *Proceedings of the Royal Society of*  
393 *London. Series B: Biological Sciences*, 271(1553), 2131–2134.
- 394 Dey, A., Zele, A. J., Feigl, B., & Adhikari, P. (2021). Threshold vision under full-field stimulation: Revisiting  
395 the minimum number of quanta necessary to evoke a visual sensation. *Vision Research*, 180, 1–10.
- 396 Dickson, D. H., & Collard, T. R. (1979). Retinal development in the lamprey (*Petromyzon marinus* L.):  
397 Premetamorphic ammocoete eye. *American Journal of Anatomy*, 154(3), 321–336.

- 398 Douglass, J. K., Wilkens, L., Pantazelou, E., & Moss, F. (1993). Noise enhancement of information transfer  
399 in crayfish mechanoreceptors by stochastic resonance. *Nature*, *365*(6444), 337–340.
- 400 Dowling, T. E., Martasian, D. P., & Jeffery, W. R. (2002). Evidence for multiple genetic forms with similar  
401 eyeless phenotypes in the blind cavefish, *Astyanax mexicanus*. *Molecular Biology and Evolution*, *19*(4),  
402 446–455.
- 403 Duboué, E. R., Keene, A. C., & Borowsky, R. L. (2011). Evolutionary convergence on sleep loss in cavefish  
404 populations. *Current Biology*, *21*(8), 671–676. <https://doi.org/10.1016/j.cub.2011.03.020>
- 405 Fernholm, B., & Holmberg, K. (1975). The eyes in three genera of hagfish (Eptatretus, Paramyxine  
406 and Myxine)—A case of degenerative evolution. *Vision Research*, *15*(2), 253–IN4.
- 407 Flock, A., & Russell, I. J. (1973). The post-synaptic action of efferent fibres in the lateral line organ of the  
408 burbot *Lota lota*. *The Journal of Physiology*, *235*(3), 591–605.  
409 <https://doi.org/10.1113/jphysiol.1973.sp010406>
- 410 Fox, J., & Weisberg, S. (2018). *An R companion to applied regression*. Sage publications.
- 411 Hassan, E. S. (1989). Hydrodynamic imaging of the surroundings by the lateral line of the blind cave fish  
412 *Anoptichthys jordani*. In *The mechanosensory lateral line* (pp. 217–227). Springer.
- 413 Hedwig, B. (2006). Pulses, patterns and paths: Neurobiology of acoustic behaviour in crickets. *Journal of*  
414 *Comparative Physiology A*, *192*(7), 677–689. <https://doi.org/10.1007/s00359-006-0115-8>
- 415 Herman, A., Brandvain, Y., Weagley, J., Jeffery, W. R., Keene, A. C., Kono, T. J., Bilandžija, H., Borowsky,  
416 R., Espinasa, L., & O'Quin, K. (2018). The role of gene flow in rapid and repeated evolution of cave-  
417 related traits in Mexican tetra, *Astyanax mexicanus*. *Molecular Ecology*, *27*(22), 4397–4416.
- 418 Hoke, K., Schwartz, A., & Soares, D. (2012). Evolution of the fast start response in the cavefish *Astyanax*  
419 *mexicanus*. *Behavioral Ecology and Sociobiology*, *66*(8), 1157–1164.
- 420 Hüppop, K. (1987). Food-finding ability in cave fish (*Astyanax fasciatus*). *International Journal of*  
421 *Speleology*, *16*(1), 4.
- 422 Jaggard, J. B., Lloyd, E., Yuiska, A., Patch, A., Fily, Y., Kowalko, J. E., Appelbaum, L., Duboue, E. R., &  
423 Keene, A. C. (2020). Cavefish brain atlases reveal functional and anatomical convergence across  
424 independently evolved populations. *Science Advances*, *6*(38), eaba3126.
- 425 Jaggard, J. B., Stahl, B. A., Lloyd, E., Prober, D. A., Duboue, E. R., & Keene, A. C. (2018). Hypocretin  
426 underlies the evolution of sleep loss in the Mexican cavefish. *Elife*, *7*, e32637.
- 427 Jaggard, J., Robinson, B. G., Stahl, B. A., Oh, I., Masek, P., Yoshizawa, M., & Keene, A. C. (2017). The  
428 lateral line confers evolutionarily derived sleep loss in the Mexican cavefish. *Journal of Experimental*  
429 *Biology*, *220*(2), 284–293. <https://doi.org/10.1242/jeb.145128>

- 430 Jourjine, N., & Hoekstra, H. E. (2021). Expanding evolutionary neuroscience: Insights from comparing  
431 variation in behavior. *Neuron*.
- 432 Kelley, J. L., Chapuis, L., Davies, W. I. L., & Collin, S. P. (2018). Sensory System Responses to Human-  
433 Induced Environmental Change. *Frontiers in Ecology and Evolution*, 6.  
434 <https://doi.org/10.3389/fevo.2018.00095>
- 435 Kiang, N. Y.-S. (1965). *Discharge patterns of single fibers in the cat's auditory nerve*. MASSACHUSETTS  
436 INST OF TECH CAMBRIDGE RESEARCH LAB OF ELECTRONICS.
- 437 Kishida, R., Goris, R. C., Nishizawa, H., Koyama, H., Kadota, T., & Amemiya, F. (1987). Primary neurons of  
438 the lateral line nerves and their central projections in hagfishes. *Journal of Comparative Neurology*,  
439 264(3), 303–310.
- 440 Köppl, C. (1997). Frequency tuning and spontaneous activity in the auditory nerve and cochlear nucleus  
441 magnocellularis of the barn owl *Tyto alba*. *Journal of Neurophysiology*, 77(1), 364–377.  
442 <https://doi.org/10.1152/jn.1997.77.1.364>
- 443 Köppl, C. (2011). Evolution of the octavolateral efferent system. In *Auditory and vestibular efferents* (pp.  
444 217–259). Springer.
- 445 Kowalko, J. (2020). Utilizing the blind cavefish *Astyanax mexicanus* to understand the genetic basis of  
446 behavioral evolution. *Journal of Experimental Biology*, 223(jeb208835).  
447 <https://doi.org/10.1242/jeb.208835>
- 448 Koyama, H., Kishida, R., Goris, R. C., & Kusunoki, T. (1990). Organization of the primary projections of the  
449 lateral line nerves in the lamprey *Lampetra japonica*. *Journal of Comparative Neurology*, 295(2), 277–  
450 289.
- 451 Krasne, F. B., & Bryan, J. S. (1973). Habituation: Regulation through Presynaptic Inhibition. *Science*,  
452 182(4112), 590–592.
- 453 Liu, K. S., & Fetcho, J. R. (1999). Laser ablations reveal functional relationships of segmental hindbrain  
454 neurons in zebrafish. *Neuron*, 23(2), 325–335.
- 455 Lloyd, E., Olive, C., Stahl, B. A., Jaggard, J. B., Amaral, P., Duboué, E. R., & Keene, A. C. (2018).  
456 Evolutionary shift towards lateral line dependent prey capture behavior in the blind Mexican cavefish.  
457 *Developmental Biology*, 441(2), 328–337. <https://doi.org/10.1016/j.ydbio.2018.04.027>
- 458 Lunsford, E. T., & Liao, J. C. (2021). Activity of Posterior Lateral Line Afferent Neurons during Swimming  
459 in Zebrafish. *JoVE (Journal of Visualized Experiments)*, 168, e62233. <https://doi.org/10.3791/62233>
- 460 Lunsford, E. T., Skandalis, D. A., & Liao, J. C. (2019). Efferent modulation of spontaneous lateral line  
461 activity during and after zebrafish motor commands. *Journal of Neurophysiology*, 122(6), 2438–2448.

- 462 Manley, G. A., & Robertson, D. (1976). Analysis of spontaneous activity of auditory neurones in the spiral  
463 ganglion of the guinea-pig cochlea. *The Journal of Physiology*, 258(2), 323–336.  
464 <https://doi.org/10.1113/jphysiol.1976.sp011422>
- 465 Masino, M. A., & Fetcho, J. R. (2005). Fictive swimming motor patterns in wild type and mutant larval  
466 zebrafish. *Journal of Neurophysiology*, 93(6), 3177–3188. <https://doi.org/10.1152/jn.01248.2004>
- 467 McBride, C. S. (2007). Rapid evolution of smell and taste receptor genes during host specialization in  
468 *Drosophila sechellia*. *Proceedings of the National Academy of Sciences*, 104(12), 4996–5001.  
469 <https://doi.org/10.1073/pnas.0608424104>
- 470 McGaugh, S. E., Kowalko, J. E., Duboué, E., Lewis, P., Franz-Odenaal, T. A., Rohner, N., Gross, J. B., &  
471 Keene, A. C. (2020). Dark world rises: The emergence of cavefish as a model for the study of evolution,  
472 development, behavior, and disease. *Journal of Experimental Zoology Part B: Molecular and*  
473 *Developmental Evolution*, 334(7–8), 397–404. <https://doi.org/10.1002/jez.b.22978>
- 474 McHenry, M. J., Feitl, K. E., Strother, J. A., & Van Trump, W. J. (2009). Larval zebrafish rapidly sense the  
475 water flow of a predator's strike. *Biology Letters*, 5(4), 477–479. <https://doi.org/10.1098/rsbl.2009.0048>
- 476 McHenry, M. J., Strother, J. A., & Van Netten, S. M. (2008). Mechanical filtering by the boundary layer  
477 and fluid–structure interaction in the superficial neuromast of the fish lateral line system. *Journal of*  
478 *Comparative Physiology A*, 194(9), 795.
- 479 Mekdara, P. J., Schwalbe, M. A. B., Coughlin, L. L., & Tytell, E. D. (2018). The effects of lateral line  
480 ablation and regeneration in schooling giant danios. *The Journal of Experimental Biology*, 221(Pt 8).  
481 <https://doi.org/10.1242/jeb.175166>
- 482 Mohr, C., Roberts, P. D., & Bell, C. C. (2003). The Mormyromast Region of the Mormyrid Electrosensory  
483 Lobe. I. Responses to Corollary Discharge and Electrosensory Stimuli. *Journal of Neurophysiology*, 90(2),  
484 1193–1210. <https://doi.org/10.1152/jn.00211.2003>
- 485 Montgomery, J., Bodznick, D., & Halstead, M. (1996). Hindbrain signal processing in the lateral line  
486 system of the dwarf scorpionfish *Scopeana papillosus*. *Journal of Experimental Biology*, 199(4), 893–899.
- 487 Montgomery, J. C., & Bodznick, D. (1994). An adaptive filter that cancels self-induced noise in the  
488 electrosensory and lateral line mechanosensory systems of fish. *Neuroscience Letters*, 174(2), 145–148.  
489 [https://doi.org/10.1016/0304-3940\(94\)90007-8](https://doi.org/10.1016/0304-3940(94)90007-8)
- 490 Nakamura, T. (1997). Quantitative analysis of gait in the visually impaired. *Disability and Rehabilitation*,  
491 19(5), 194–197.
- 492 Odstrcil, I., Petkova, M. D., Haesemeyer, M., Boulanger-Weill, J., Nikitchenko, M., Gagnon, J. A., Oteiza,  
493 P., Schalek, R., Peleg, A., Portugues, R., Lichtman, J. W., & Engert, F. (2021). Functional and  
494 ultrastructural analysis of reafferent mechanosensation in larval zebrafish. *Current Biology: CB*, S0960-  
495 9822(21)01530-X. <https://doi.org/10.1016/j.cub.2021.11.007>



- 496 Olszewski, J., Haehnel, M., Taguchi, M., & Liao, J. C. (2012). Zebrafish larvae exhibit rheotaxis and can  
497 escape a continuous suction source using their lateral line. *PloS One*, 7(5), e36661.  
498 <https://doi.org/10.1371/journal.pone.0036661>
- 499 Oteiza, P., Odstrcil, I., Lauder, G., Portugues, R., & Engert, F. (2017). A novel mechanism for  
500 mechanosensory-based rheotaxis in larval zebrafish. *Nature*, 547(7664), 445–448.
- 501 Patton, P., Windsor, S., & Coombs, S. (2010). Active wall following by Mexican blind cavefish (*Astyanax*  
502 *mexicanus*). *Journal of Comparative Physiology A*, 196(11), 853–867.
- 503 Paz, A., McDole, B., Kowalko, J. E., Duboue, E. R., & Keene, A. C. (2020). Evolution of the acoustic startle  
504 response of Mexican cavefish. *Journal of Experimental Zoology Part B: Molecular and Developmental*  
505 *Evolution*, 334(7–8), 474–485.
- 506 Pichler, P., & Lagnado, L. (2020). Motor Behavior Selectively Inhibits Hair Cells Activated by Forward  
507 Motion in the Lateral Line of Zebrafish. *Current Biology*, 30(1), 150-157.e3.  
508 <https://doi.org/10.1016/j.cub.2019.11.020>
- 509 Reinig, S., Driever, W., & Arrenberg, A. B. (2017). The descending diencephalic dopamine system is  
510 tuned to sensory stimuli. *Current Biology*, 27(3), 318–333.
- 511 Riddle, M. R., Aspiras, A. C., Gaudenz, K., Peuß, R., Sung, J. Y., Martineau, B., Peavey, M., Box, A. C.,  
512 Tabin, J. A., McGaugh, S., Borowsky, R., Tabin, C. J., & Rohner, N. (2018). Insulin resistance in cavefish as  
513 an adaptation to a nutrient-limited environment. *Nature*, 555(7698), 647–651.  
514 <https://doi.org/10.1038/nature26136>
- 515 Roberts, B. L., & Russell, I. J. (1972). The activity of lateral-line efferent neurones in stationary and  
516 swimming dogfish. *The Journal of Experimental Biology*, 57(2), 435–448.
- 517 Russell, I. J., & Roberts, B. L. (1972). Inhibition of Spontaneous Lateral-Line Activity by Efferent Nerve  
518 Stimulation. *Journal of Experimental Biology*, 57(1), 77–82.
- 519 RW Mitchell, Russell, W., & Elliot, W. (1997). Mexican eyeless characin fishes, genus *Astyanax*:  
520 Environment, distribution, and evolution. *Texas Tech Press*.  
521 [https://scholar.google.com/scholar\\_lookup?title=Mexican%20eyeless%20characin%20fishes%2C%20genus%20Astyanax%3A%20environment%2C%20distribution%2C%20and%20evolution.%2C%20Special%20publications%20the%20museum%20Texas%20Tech%20University&author=R.W.%20Mitchell&publication\\_year=1977](https://scholar.google.com/scholar_lookup?title=Mexican%20eyeless%20characin%20fishes%2C%20genus%20Astyanax%3A%20environment%2C%20distribution%2C%20and%20evolution.%2C%20Special%20publications%20the%20museum%20Texas%20Tech%20University&author=R.W.%20Mitchell&publication_year=1977)
- 525 Sharma, S., Coombs, S., Patton, P., & De Perera, T. B. (2009). The function of wall-following behaviors in  
526 the Mexican blind cavefish and a sighted relative, the Mexican tetra (*Astyanax*). *Journal of Comparative*  
527 *Physiology A*, 195(3), 225–240.

- 528 Skandalis, D. A., Lunsford, E. T., & Liao, J. C. (2021). Corollary discharge enables proprioception from  
529 lateral line sensory feedback. *PLoS Biology*, *19*(10), e3001420.  
530 <https://doi.org/10.1371/journal.pbio.3001420>. <https://doi.org/10.1371/journal.pbio.3001420>
- 531 Soustelle, L., Aigouy, B., Asensio, M.-L., & Giangrande, A. (2008). UV laser mediated cell selective  
532 destruction by confocal microscopy. *Neural Development*, *3*(1), 11. [https://doi.org/10.1186/1749-8104-](https://doi.org/10.1186/1749-8104-3-11)  
533 [3-11](https://doi.org/10.1186/1749-8104-3-11)
- 534 Stewart, W. J., Cardenas, G. S., & McHenry, M. J. (2013). Zebrafish larvae evade predators by sensing  
535 water flow. *The Journal of Experimental Biology*, *216*(Pt 3), 388–398.  
536 <https://doi.org/10.1242/jeb.072751>
- 537 Stockdale, W. T., Lemieux, M. E., Killen, A. C., Zhao, J., Hu, Z., Riepsaame, J., Hamilton, N., Kudoh, T.,  
538 Riley, P. R., van Aerle, R., Yamamoto, Y., & Mommersteeg, M. T. M. (2018). Heart Regeneration in the  
539 Mexican Cavefish. *Cell Reports*, *25*(8), 1997–2007.e7. <https://doi.org/10.1016/j.celrep.2018.10.072>
- 540 Straka, H., Simmers, J., & Chagnaud, B. P. (2018). A New Perspective on Predictive Motor Signaling.  
541 *Current Biology*, *28*(5), R232–R243. <https://doi.org/10.1016/j.cub.2018.01.033>
- 542 Tan, D., Patton, P., & Coombs, S. (2011). Do blind cavefish have behavioral specializations for active  
543 flow-sensing? *Journal of Comparative Physiology A*, *197*(7), 743–754.
- 544 Teyke, T. (1985). Collision with and avoidance of obstacles by blind cave fish *Anoptichthys jordani*  
545 (Characidae). *Journal of Comparative Physiology A*, *157*(6), 837–843.
- 546 Teyke, T. (1990). Morphological differences in neuromasts of the blind cave fish *Astyanax hubbsi* and the  
547 sighted river fish *Astyanax mexicanus*. *Brain, Behavior and Evolution*, *35*(1), 23–30.
- 548 Trapani, J. G., & Nicolson, T. (2011). Mechanism of spontaneous activity in afferent neurons of the  
549 zebrafish lateral-line organ. *The Journal of Neuroscience: The Official Journal of the Society for*  
550 *Neuroscience*, *31*(5), 1614–1623. <https://doi.org/10.1523/JNEUROSCI.3369-10.2011>
- 551 Tricas, T. C., & Highstein, S. M. (1991). Action of the octavolateralis efferent system upon the lateral line  
552 of free-swimming toadfish, *Opsanus tau*. *Journal of Comparative Physiology A*, *169*(1), 25–37.  
553 <https://doi.org/10.1007/BF00198170>
- 554 Uysal, S. A., Erden, Z., Akbayrak, T., & Demirtürk, F. (2010). Comparison of balance and gait in visually or  
555 hearing impaired children. *Perceptual and Motor Skills*, *111*(1), 71–80.
- 556 Van Trump, W. J., Coombs, S., Duncan, K., & McHenry, M. J. (2010). Gentamicin is ototoxic to all hair  
557 cells in the fish lateral line system. *Hearing Research*, *261*(1–2), 42–50.
- 558 Varatharasan, N., Croll, R. P., & Franz-Odenaal, T. (2009). Taste bud development and patterning in  
559 sighted and blind morphs of *Astyanax mexicanus*. *Developmental Dynamics: An Official Publication of*  
560 *the American Association of Anatomists*, *238*(12), 3056–3064. <https://doi.org/10.1002/dvdy.22144>

- 561 Von Campenhausen, C., Riess, I., & Weissert, R. (1981). Detection of stationary objects by the blind cave  
562 fish *Anoptichthys jordani* (Characidae). *Journal of Comparative Physiology*, *143*(3), 369–374.
- 563 Warren, W. C., Boggs, T. E., Borowsky, R., Carlson, B. M., Ferrufino, E., Gross, J. B., Hillier, L., Hu, Z.,  
564 Keene, A. C., & Kenzior, A. (2021). A chromosome-level genome of *Astyanax mexicanus* surface fish for  
565 comparing population-specific genetic differences contributing to trait evolution. *Nature*  
566 *Communications*, *12*(1), 1–12.
- 567 Wickham, H. (2007). Reshaping Data with the **reshape** Package. *Journal of Statistical Software*, *21*(12).  
568 <https://doi.org/10.18637/jss.v021.i12>
- 569 Wickham, H. (2009). *The split-apply-combine strategy for data analysis*.
- 570 Wickham, H., François, R., Henry, L., & Müller, K. (2019). dplyr: A Grammar of Data Manipulation. R  
571 package version 0.8.0.1. Retrieved January, 13, 2020.
- 572 Wilke, C. O. (2019). cowplot: Streamlined plot theme and plot annotations for ‘ggplot2.’ *R Package*  
573 *Version 0.9*, 4.
- 574 Windsor, S. P., Tan, D., & Montgomery, J. C. (2008). Swimming kinematics and hydrodynamic imaging in  
575 the blind Mexican cave fish (*Astyanax fasciatus*). *Journal of Experimental Biology*, *211*(18), 2950–2959.
- 576 Yamamoto, Y., Byerly, M. S., Jackman, W. R., & Jeffery, W. R. (2009). Pleiotropic functions of embryonic  
577 sonic hedgehog expression link jaw and taste bud amplification with eye loss during cavefish evolution.  
578 *Developmental Biology*, *330*(1), 200–211.
- 579 Yoffe, M., Patel, K., Palia, E., Kolawole, S., Streets, A., Haspel, G., & Soares, D. (2020). Morphological  
580 malleability of the lateral line allows for surface fish (*Astyanax mexicanus*) adaptation to cave  
581 environments. *Journal of Experimental Zoology Part B: Molecular and Developmental Evolution*, *334*(7–  
582 8), 511–517. <https://doi.org/10.1002/jez.b.22953>
- 583 Yoshizawa, M., Gorički, Š., Soares, D., & Jeffery, W. R. (2010). Evolution of a Behavioral Shift Mediated by  
584 Superficial Neuromasts Helps Cavefish Find Food in Darkness. *Current Biology*, *20*(18), 1631–1636.  
585 <https://doi.org/10.1016/j.cub.2010.07.017>
- 586 Yoshizawa, M., Jeffery, W. R., Netten, S. M. van, & McHenry, M. J. (2014). The sensitivity of lateral line  
587 receptors and their role in the behavior of Mexican blind cavefish (*Astyanax mexicanus*). *Journal of*  
588 *Experimental Biology*, *217*(6), 886–895. <https://doi.org/10.1242/jeb.094599>
- 589
